# Supplementary material for: G-allele of Intronic rs10830963 inMTNR1BConfers Increased Risk of Impaired Fasting Glycemia and Type 2 Diabetes Through an Impaired Glucose-Stimulated Insulin Release
Source: Oxford University Press journal article supplement (doi:10.2337/db08-1660), 2009-03-26
Supplement: db081660-sup-sparso_online_appendix_r2_02mar.doc [file db081660-sup-sparso_online_appendix_r2_02mar.doc]

**Online-Only Appendix Table 1** Clinical characteristics of 11,375 individuals from the DESIR, NFBC86 and Haguenau study populations.

|  | **DESIR** | **NFBC86** | **Haguenau** |
| --- | --- | --- | --- |
| ***N* (Men/Woman)** | 4,656 (2,279/2,377) | 5,258 (2,602/2,652) | 1,461 (692/769) |
| **Age (years)** | 47 ± 10 | 16 ± 0 | 22 ± 4 |
| **BMI (kg/m²)** | 24.6 ± 3.7 | 21.28 ± 3.7 | 22.59 ± 4.1 |
| **HbA1C (%)** | 5.27 ± 0.45 | NA | NA |
| **FPG (mmol/l)** | 5.3 ± 0.5 | 5.2 ± 0.4 | 4.8 ± 0.4 |
| **Waist (cm)** | 83 ± 12 | 74 ± 9 | 78 ± 11 |

Data are mean ± standard deviation.

Details of the DESIR, NFBC86 and Haguenau study populations with at least one SNP successfully genotyped and available values of fasting plasma glucose are given in Online-Only Appendix Table 1.

For quantitative trait studies we only analyzed non-diabetic individuals. The homeostasis index of insulin release (HomaB) was calculated as HomaB=(20 × ‘fasting insulin’)/(‘fasting glucose’ – 3.5) where ‘fasting insulin’ is in mU/l and ‘fasting glucose’ is in mmol/l (1). HOMA-IR was calculated as (fasting plasma glucose (mmol/l) × fasting serum insulin (pmol/l)) / 22.5.

For each study sample, weight, height, waist circumferences and blood pressure were measured by trained personnel, and BMI (kg/m²) was calculated. Venous blood samples were collected in the morning after subjects had fasted 12 h over night.

***DESIR.*** All biochemical measurements were from one of four health-centre laboratories located in France at Blois, Chartres, La Riche or Orléans. The inter-laboratory variability was assessed monthly on normal and pathological values for each biological variable. Fasting plasma glucose was assayed by the glucose oxidase method applied to fluoro-oxalated plasma, using a Technicon RA 1000 (Bayer, Puteaux, France) or a Kone Automate (Evry, France); fasting serum insulin was measured by an enzymoimmunoassay with IMX (Abbott, Rungis, France) (2). Insulin was quantified by micro particle enzyme immunoassay with an automated analyzer IMX (Abbott, Rungis, France). Total cholesterol, HDL-cholesterol and triglycerides were assayed by DAX 24 (Bayer Diagnostics, Puteaux, France) or KONE (Evry, France) (3).

***NFBC86.*** Serum total cholesterol, high density lipoprotein cholesterol, low density lipoprotein cholesterol, triglycerides and plasma glucose were assayed by Cobas Integra 700 automatic analyzer (Hoffmann-LaRoche, Basel, Switzerland). The concentrations of serum insulin were analyzed by radioimmunoassay (Pharmacia Diagnostics, Uppsala, Sweden) (4).

***Haguenau.*** Glucose, cholesterol, high density lipoprotein cholesterol, and triglyceride concentrations were measured by enzymatic methods (5; 6). Insulin concentration was measured by a specific immunoradiometric assay using two monoclonal anti-insulin antibodies (Bi-insulin immunoradiometric assay, ERIA Diagnostics Pasteur, France).

**Online-Only Appendix Table 2** Clinical characteristics of 8,552 examined Danish individuals

|  | Population-based sample of young twins | Population-based sample of elderly twins | Population-based study of young healthy individuals |  | Inter99 |  | Steno Diabetes Center | |
| --- | --- | --- | --- | --- | --- | --- | --- | --- |
|  | Non-diabetic treatment-naïve individuals | Glucose tolerant individuals | Type 2 diabetes  patients | Glucose tolerant individuals | Type 2 diabetes patients |
| *n* | 97 | 77 | 372 | 5,553 | 4,400 | 322 | 505 | 1,626 |
| Men/women | (54/43) | (33/44) | (184/188) | (2,722/2,831) | (2038/2362) | (196/126) | (239/266) | (1,004/622) |
| Age (years) | 28 ± 2 | 62 ± 2 | 25 ± 3 | 46 ± 8 | 45 ± 8 | 51 ± 7 | 57 ± 10 | 62± 11 |
| BMI (kg/m2) | 24.1± 3 | 26.2 ± 4.5 | 23.6 ± 3.7 | 26.0 ± 4.4 | 25.5 ± 4.1 | 30.1 ± 5.7 | 25.7± 3.7 | 30 ± 5.5 |
| HbA1C (%) | NA | NA | NA | 5.8 ± 0.4 | 5.8 ± 0.4 | 7.1 ± 1.7 | 5.8 ± 0.4 | 8.0 ± 1.6* |
| FPG (mmol/l) | 5.4 ± 0.3 | 5.7 ± 0.7 | 5.0 ± 0.5 | 5.5 ± 0.5 | 5.3 ± 0.4 | 8.2 ± 3.1 | 5.1 ± 0.4 | 9.7 ± 3.5* |
| Waist (cm) | 83 ± 11 | 91 ± 14 | 78 ± 11 | 86 ± 13 | 84 ± 12 | 98 ± 14 | 87 ± 11 | 104 ± 14 |

*The values are estimated from 790 patients with available data.

Details of the study populations with a successful *MTNR1B* rs10830963 genotype are given in Online-Only Appendix Table 1. Patients with type 2 diabetes were recruited from the out-patient clinic at Steno Diabetes Center (*n*=1,626), and from the population-based Inter99 cohort established at Research Centre for Prevention and Health *(n*=322) (7; 8). Individuals with isolated IFG, isolated IGT and combined IFG-IGT (*n*=485, *n*=464 and *n*=201, respectively) were recruited from the population-based Inter99 cohort. Glucose-tolerant subjects were recruited from Steno Diabetes Center (*n*=505) or through the population-based Inter99 cohort (*n*=4,400). The population-based sample of young healthy subjects was established at the Research Centre for Prevention and Health (9) (*n*=372).

Elderly (monozygotic *n*=41, dizygotic *n*=36) and young (monozygotic *n*=58, dizygotic *n*=39) twins were identified through the population-based Danish Twin Register. The population of elderly twins included individuals with NGT=58, IGT=16 and screen-detected type 2 diabetes=3 and in the population of young twins all were glucose tolerant. Zygosity was determined by polymorphic genetic markers (10).

In the present study, patients with diabetes due to known chronic pancreatitis, haemochromatosis, severe insulin resistance, maturity-onset diabetes of the young, maternally inherited diabetes and deafness, patients with a family history of first degree relatives with type 1 diabetes, patients with insulin requirement within the first year after diabetes diagnosis, patients with a fasting serum C-peptide level ≤ 150 pmol/liter at

the time of recruitment, or patients tested GAD65 antibody positive were excluded from the category of clinically defined type 2 diabetes. States of impaired glucose regulation (IFG, IGT, and type 2 diabetes) were diagnosed in accordance with WHO 1999 criteria (11).

***The Inter99 study***

For participants from the population-based Inter99 cohort (7; 8) as well as for samples recruited from the outpatient clinic of Steno Diabetes Center blood samples were drawn after a 12-h overnight fast and following an oral glucose tolerance test. Plasma-glucose was analyzed by a glucose oxidase method (Granutest, Merck, Darmstadt, Germany). HbA1C was measured by ion-exchange high performance liquid chromatography (normal reference range: 4.1-6.4 %) and serum-insulin (excluding des(31, 32) and intact proinsulin) was measured using the AutoDELFIA insulin kit (Perkin-Elmer, Wallac, Turku, Finland). Cross-reactivities with proinsulin, C-peptide and Des (31, 32)-split product in the insulin assay were all less than 0.4%. Serum-C-peptide concentrations were measured by a time-resolved flouroimmunoassay using the AotoDelfi C-peptide kit (Perkin-Elmer, Wallac, Turku, Finland). Insulinogenic index was calculated as (serum insulin at 30 minutes [pmol/l] - fasting serum insulin [pmol/l]) / plasma glucose at 30 minutes (mmol/l). HOMA-IR was calculated as (fasting plasma glucose (mmol/l) × fasting serum insulin (pmol/l)) / 22.5. BIGTT-insulin sensitivity index (BIGTT-SI) and BIGTT-acute insulin response (BIGTT-AIR) uses information on sex and BMI combined with analysis of plasma-glucose and serum-insulin levels at the time points 0, 30, and 120 min to provide indexes for Si and AIR that are highly correlated with indexes obtained during an IVGTT, and were calculated as described elsewhere (12).

***The study of young healthy Danes***

Each of the 372 young healthy Danes (9) underwent an intravenous glucose tolerance test after a 12-h overnight fast. An intravenous injection of 0.3 g glucose per kg body weight were given at time zero and an intravenous injection of 3 mg tolbutamide per kg body weight were given after 20 min. The plasma-glucose concentration was measured by an automated glucose oxidase method (Granu-test: Merck, Damstadt, Germany) and concentration of insulin (excluding des(31, 32)- and intact proinsulin) in serum was measured by ELISA applying the Dako insulin kit with overnight incubation (code NO. K6219; Dako Diagnostics Ltd., Ely, United Kingdom). Cross-reactivities with proinsulin, C-peptide and Des (31, 32)-split product in the insulin assay were all less than 0.4%. Acute serum insulin response 0-8 minutes (pmol/l×min) and acute serum insulin after tolbutamide injection 0-10 minutes (pmol/l×min) were calculated applying the trapezoidal rule as the incremental values. Insulin sensitivity index was calculated using the Bergman MINMOD computer programme developed specifically for the combined intravenous glucose and tolbutamide tolerance test (13). Disposition index was calculated as insulin sensitivity index (10-5 × (min × pmol/l)-1) multiplied by acute serum-insulin response 0-8 minutes (pmol/l×min).

***The twin studies***

The subjects included in the twin study underwent an intravenous glucose tolerance test (IVGTT) followed by a 2-hour hyperinsulinemic, euglycemic clamp (40 mU/m2/min) (10). Plasma glucose concentrations were analyzed by the glucose dehydrogenase oxidation method. Plasma insulin concentrations were measured using a two-site, two-step time resolved immunofluoremetric assay (DELFIA, Turku, Finland). Cross-reactivities with proinsulin, C-peptide and Des (31, 32)-split product in the insulin assay were all less than 0.4%. Glucose appearance rates, glucose disposal rates and hepatic glucose production rates were calculated during the steady state periods. Hepatic glucose production was calculated by subtracting the rate of the exogenous glucose infusion from the rate of appearance of 3-3H-tritiated glucose. Acute plasma insulin response 0-10 minutes (pmol/l×min) was calculated applying the trapezoidal rule as the incremental values.

Height and body weight for all participants were measured in light indoor clothes and without shoes, and BMI was calculated as weight (kg)/(height (m))2. Waist circumference was measured in the upright position midway between the iliac crest and the lower costal margin.

**Online-Only Appendix Table 3. Association between SNPs in the *MTNR1B* locus and fasting plasma glucose in non-diabetic individuals from DESIR, the NFBC86 and Haguenau populations.**

| **SNPs** | **Position** | | **DESIR** | | | | **NFBC86** | | | | **Haguenau** | | | | **Meta-analyses** | | |
| --- | --- | --- | --- | --- | --- | --- | --- | --- | --- | --- | --- | --- | --- | --- | --- | --- | --- |
| **ID** | **Chr11 (bp)** | **Gene** | **MAF** | **Effect per allele (mmol/l) [95% CI]** | P | ***P*adjust1** | **MAF** | **Effect per allele (mmol/l) [95% CI]** | P | ***P*adjust 1** | **MAF** | **Effect per allele (mmol/l) [95% CI]** | P | ***P*adjust1** | **Effect per allele (mmol/l) [95% CI]** | P | ***P*adjust2** |
| **rs7112766** | 92311669 | 5’ | 0.34 | 0.07 0.05-0.09] | 1.0×10-10 | 0.72 | 0.38 | 0.04 [0.03-0.06] | 4.2×10-8 | 0.99 | 0.31 | 0.03  [0.00-0.06] | 0.05 | 0.76 | 0.05 [0.04-0.06] | 8.3×10-16 | 0.55 |
| **rs1387153** | 92313476 | 5’ | 0.29 | 0.08 [0.06-0.10] | 4.9×10-13 | 0.18 | 0.35 | 0.05  [0.03-0.07] | 2.3×10-9 | 0.32 | 0.26 | 0.03  [0.001-0.06] | 0.04 | 0.47 | 0.05 [0.04-0.07] | 9.4×10-19 | 0.44 |
| **rs11523890** | 92319426 | 5’ | 0.36 | 0.06 [0.04-0.08] | 7.6×10-8 | 0.11 | 0.40 | 0.04  [0.03-0.06] | 2.2×10-7 | 0.73 | 0.32 | 0.02  [-0.01-0.05] | 0.15 | 0.86 | 0.04  [0.03-0.05] | 4.6×10-12 | 0.16 |
| **rs10830956** | 92320661 | 5’ | 0.29 | 0.08 [0.06-0.10] | 2.8×10-13 | 0.92 | 0.35 | 0.05  [0.03-0.06] | 7.2×10-9 | 0.74 | 0.28 | 0.03 [0.002-0.06] | 0.04 | 0.95 | 0.05  [0.04-0.07] | 8.0×10-18 | 0.44 |
| **rs10765573** | 92322980 | 5’ | 0.36 | 0.05 [0.03-0.07] | 1.9×10-7 | 0.19 | 0.40 | 0.04  [0.02-0.06] | 3.3×10-7 | 0.18 | 0.33 | 0.02 [-0.01-0.05] | 0.13 | 0.25 | 0.04  [0.03-0.05] | 8.6×10-12 | 0.95 |
| **rs7936247** | 92329680 | 5’ | 0.36 | 0.06 [0.04-0.08] | 4.1×10-8 | 0.38 | 0.40 | 0.04 [0.02-0.06] | 8.1×10-7 | 0.54 | 0.33 | 0.03 [-0.01-0.05] | 0.14 | 0.77 | 0.04  [0.03-0.05] | 6.3×10-12 | 0.12 |
| **rs11020124** | 92330309 | 5’ | 0.29 | 0.08 [0.06-0.10] | 4.5×10-13 | 0.68 | 0.35 | 0.05 [0.03-0.06] | 4.8×10-9 | 0.99 | 0.26 | 0.03  [-0.002-0.06] | 0.07 | 0.96 | 0.05  [0.04-0.07] | 7.8×10-18 | 0.15 |
| **rs10830963** | 92348358 | Intron | 0.28 | 0.09  [0.07-0.11] | 9.7×10-17 | 3.5×10-6 | 0.36 | 0.06  [0.05-0.08] | 1.4×10-14 | 3.2×10-6 | 0.25 | 0.06 [0.03-0.09] | 5.5×10-5 | 0.0001 | 0.07 [0.06-0.08] | 5.3×10-31 | 5.3×10-31 |

Effect is for the beta coefficient in the regression analyses under the additive model, adjusted for age, sex and BMI. Positions in basepairs are from human Build_36. MAF: minor allele frequency. *P*adujst1: P-value from the regression model including all SNPs studied, in addition to age, sex and BMI. *P*adjust2: P-value from the regression model including rs10830963, in addition to age, sex and BMI.

**Online-Only Appendix Table 4** Two by two haplotype analyses in combination with rs10830963 of *MTNR1B*

|  | **DESIR** | | | **NFBC86** | | | **HAGUENAU** | | |
| --- | --- | --- | --- | --- | --- | --- | --- | --- | --- |
|  | **A** | **B** | **C** | **A** | **B** | **C** | **A** | **B** | **C** |
| **rs7112766** | 4.0×10-15 | 4.6×10-7 | 0.99 | 5.8×10-13 | 1.1×10-6 | 0.38 | 3.1×10-4 | 6.1×10-4 | 0.28 |
| **rs1387153** | 8.7×10-16 | 1.3×10-5 | 0.09 | 4.6×10-13 | 3.1×10-6 | 0.57 | 1.5×10-4 | 3.1×10-4 | 0.07 |
| **rs11523890** | 3.8×10-15 | 2.2×10-9 | 0.47 | 4.6×10-13 | 6.9×10-8 | 0.68 | 1.2×10-4 | 9.8×10-5 | 0.13 |
| **rs10830956** | 1.6×10-15 | 6.7×10-6 | 0.46 | 1.1×10-12 | 5.3×10-6 | 0.61 | 3.2×10-4 | 0.001 | 0.28 |
| **rs10765573** | 9.9×10-16 | 1.1×10-10 | 0.30 | 5.0×10-13 | 5.3×10-8 | 0.67 | 1.3×10-4 | 1.2×10-4 | 0.16 |
| **rs7936247** | 1.3×10-15 | 8.0×10-10 | 0.50 | 8.5×10-13 | 5.4×10-8 | 0.56 | 1.0×10-4 | 8.9×10-5 | 0.13 |
| **rs11020124** | 1.8×10-15 | 5.7×10-5 | 0.99 | 3.5×10-13 | 1.6×10-6 | 0.68 | 4.9×10-5 | 7.3×10-5 | 0.03 |

SNP 1 is rs10830963. SNP 2 is any of the following SNPs: rs7112766, rs1387153, rs11523890, rs10765573, rs7936247, rs11020124.

M0 is FPG = α + βage × age + βsex × sex + βBMI × BMI + ε

M1 is FPG = α’ + β’age × age + β’sex × sex + β’BMI × BMI + β11 × haplo11 + βhaplo12 × haplo12 + βhaplo21 × haplo21 + βhaplo22 × haplo22 + ε’

Mno1 is FPG = α’’ + β’’age × age + β’’sex × sex + β’’BMI × BMI + βhaplo11-21 × haplo[11-21] + βhaplo12-22 × haplo[12-22] + ε’’

Mno2 is FPG = α’’’ + β’’’age × age + β’’’sex × sex + β’’’BMI × BMI + βhaplo11-12 × haplo[11-12] + βhaplo21-22 × haplo[21-22] + ε’’’

A: *P*-value of the likelihood-ratio test for the comparison of M0 and M1

B: *P*-value of the likelihood-ratio test for the comparison of M1 and Mno1

C: *P*-value of the likelihood-ratio test for the comparison of M1 and Mno2

**Online-Only Appendix Table 5. French case-control association with type 2 diabetes and incidence of impaired fasting glucose and/or diabetes.**

|  | **Association with Type 2 Diabetes** | | | | | | | | **Incidence of IFG** | | **Incidence of Type 2 Diabetes** | | **Incidence of IFG or Type 2 Diabetes** | |
| --- | --- | --- | --- | --- | --- | --- | --- | --- | --- | --- | --- | --- | --- | --- |
| **SNPs** | **Type 2 Diabetes** | | | **Controls** | | | **Odd Ratio** | ***P*** | **Hazard Ratio** | ***P*** | **Hazard Ratio** | ***P*** | **Hazard Ratio** | ***P*** |
| **rs7112766** | 1,098 | 1,150 | 298 | 1,893 | 1,922 | 476 | 1.11  (1.01-1.22) | 0.03 | 1.209  (1.038-1.409) | 0.015 | 1.066  (0.858-1.324) | 0.560 | 1.205  (1.061-1.368) | 0.004 |
| **rs1387153** | 1,248 | 1,104 | 229 | 2,147 | 1,739 | 380 | 1.17  (1.06-1.29) | 0.002 | 1.235  (1.061-1.437) | 0.006 | 1.010  (0.811-1.257) | 0.930 | 1.200  (1.057-1.363) | 0.005 |
| **rs11523890** | 1,031 | 1,178 | 342 | 1,800 | 1,930 | 567 | 1.14  (1.04-1.25) | 0.004 | 1.256  (1.085-1.454) | 0.002 | 0.958  (0.776-1.184) | 0.690 | 1.183  (1.046-1.337) | 0.007 |
| **rs10830956** | 1,217 | 1,094 | 218 | 2,135 | 1,728 | 375 | 1.17  (1.06-1.29) | 0.002 | 1.227  (1.050-1.434) | 0.01 | 0.996  (0.7969-1.2448) | 0.970 | 1.188  (1.040-1.353) | 0.009 |
| **rs10765573** | 1,017 | 1,185 | 338 | 1,792 | 1,913 | 554 | 1.16  (1.05-1.27) | 0.002 | 1.266  (1.093-1.466) | 0.002 | 0.965  (0.781-1.1922) | 0.740 | 1.193  (1.055-1.349) | 0.005 |
| **rs7936247** | 1,033 | 1,174 | 342 | 1,789 | 1,916 | 560 | 1.15  (1.05-1.26) | 0.003 | 1.264  (1.092-1.463) | 0.002 | 0.957  (0.7747-1.1822) | 0.680 | 1.191  (1.053-1.346) | 0.005 |
| **rs11020124** | 1,224 | 1,084 | 229 | 2,100 | 1,707 | 370 | 1.17  (1.06-1.29) | 0.002 | 1.260  (1.080-1.471) | 0.003 | 1.001  (0.801-1.251) | 1.000 | 1.209  (1.061-1.376) | 0.004 |
| **rs10830963** | 1,243 | 1,083 | 218 | 2,205 | 1,755 | 322 | 1.19  (1.08-1.32) | 4.8×10-4 | 1.241  (1.060-1.453) | 0.007 | 1.019  (0.813-1.276) | 0.870 | 1.213  (1.063-1.384) | 0.004 |

IFG: impaired fasting glucose. The association with type 2 diabetes risk was assessed using 2,622 cases and 4,343 controls under the additive model using logistic regression analyses adjusted for age, sex and BMI. The incidence of IFG or diabetes was defined as fasting plasma glucose ≥ 6.1 mmol/l or treatment with anti-diabetic agents after a 9 years follow-up period and was assessed in 3,411 participants of the DESIR prospective data that included 334 incident cases of IFG and 183 cases of type 2 diabetes.

**Online-Only Appendix Table 6. Association between rs10830963 of *MTNR1B*** and plasma glucose and serum insulin levels during an OGTT in the Haguenau population.

| **rs10830963** | **CC** | **CG** | **GG** | **Effect per allele [95% CI]** | ***P*add** |
| --- | --- | --- | --- | --- | --- |
| **N (men/women)** | 804 (384/420) | 563 (255/308) | 82 (49/33) |  |  |
| **Age (years)** | 22.12 ± 3.89 | 22.26 ± 3.97 | 21.55 ± 3.57 |  |  |
| **BMI (kg/m²)** | 22.4 ± 3.67 | 22.84 ± 4.68 | 22.93 ± 3.97 | 0.36 (0.01;0.7) | 0.04 |
| **Plasma glucose (mmol/l)** |  |  |  |  |  |
| **Fasting** | 4.76 ± 0.37 | 4.82 ± 0.38 | 4.90 ± 0.42 | 0.06 (0.03;0.09) | 5.5×10-5 |
| **30 min post OGTT** | 7.45 ± 1.42 | 7.67 ± 1.41 | 7.90 ± 1.64 | 0.21 (0.09;0.33) | 4.1×10-4 |
| **120 min post OGTT** | 5.28 ± 1.12 | 5.38 ± 1.24 | 5.23 ± 1.00 | 0.04 (-0.06;0.13) | 0.47 |
| **Serum insulin (pmol/l)** |  |  |  |  |  |
| **Fasting** | 31.57  (22.24-43.05) | 33.36  (22.42-44.48) | 33.01  (21.52-43.77) | 0 (-4.88;4.08) | 0.83 |
| **30 min post OGTT** | 287.00  (186.55-437.68) | 287.00  (179.38-412.56) | 236.78  (145.29-425.12) | -5.82 (-10.42;-1.00) | 0.02 |
| **120 min post OGTT** | 165.03  (100.45-265.48) | 179.38  (107.62-279.82) | 136.32  (93.28-222.43) | -1.00 (-6.76;-5.13) | 0.71 |
| **Insulinogenic Index** | 101.67  (62.86-164.10) | 97.57  (57.29-151.03) | 92.55  (47.74-141.76) | -4.44  (-7.34;-1.54) | 0.003 |
| **HOMA-IR** | 6.71 (4.67-9.30) | 7.07 (4.78-9.67) | 7.20 (4.78-9.84) | 0.33  (-1,56;2.23) | 0.73 |

Effect is for the beta coefficient in the regression analyses under the additive model, adjusted for age, sex and BMI. Data are means ± standard deviation (age, BMI and values of plasma glucose) or median (interquantile range). Values of serum insulin, homeostasis model assessment of insulin resistance (HOMA-IR) and insulinogenic index were logarithmically transformed before statistical analysis and their beta values are presented as the increase/decrease in percent. Calculations of HOMA-IR, insulinogenic index are described in Online-Only Appendix Table 1.

**References**

1. Wallace TM, Levy JC, Matthews DR: Use and abuse of HOMA modeling. *Diabetes Care* 27:1487-1495, 2004

2. Gallois Y, Vol S, Caces E, Balkau B: Distribution of fasting serum insulin measured by enzyme immunoassay in an unselected population of 4,032 individuals. Reference values according to age and sex. D.E.S.I.R. Study Group. Donnees Epidemiologiques sur le Syndrome d'Insulino-Resistance. *Diabetes Metab* 22:427-431, 1996

3. Balkau B, Lange C, Fezeu L, Tichet J, de Lauzon-Guillain B, Czernichow S, Fumeron F, Froguel P, Vaxillaire M, Cauchi S, Ducimetiere P, Eschwege E: Predicting diabetes: clinical, biological, and genetic approaches: data from the Epidemiological Study on the Insulin Resistance Syndrome (DESIR). *Diabetes Care* 31:2056-2061, 2008

4. Koponen H, Maki P, Halonen H, Miettunen J, Laitinen J, Tammelin T, Moilanen I, Taanila A, Ruokonen A, Korkeila J, Veijola J: Insulin resistance and lipid levels in adolescents with familial risk for psychosis. *Acta Psychiatr Scand* 117:337-341, 2008

5. Leger J, Levy-Marchal C, Bloch J, Pinet A, Chevenne D, Porquet D, Collin D, Czernichow P: Reduced final height and indications for insulin resistance in 20 year olds born small for gestational age: regional cohort study. *Bmj* 315:341-347, 1997

6. Verkauskiene R, Figueras F, Deghmoun S, Chevenne D, Gardosi J, Levy-Marchal M: Birth weight and long-term metabolic outcomes: does the definition of smallness matter? *Horm Res* 70:309-315, 2008

7. Jorgensen T, Borch-Johnsen K, Thomsen TF, Ibsen H, Glumer C, Pisinger C: A randomized non-pharmacological intervention study for prevention of ischaemic heart disease: baseline results Inter99. *Eur J Cardiovasc Prev Rehabil* 10:377-386, 2003

8. Glumer C, Jorgensen T, Borch-Johnsen K: Prevalences of diabetes and impaired glucose regulation in a Danish population: the Inter99 study. *Diabetes Care* 26:2335-2340, 2003

9. Clausen JO, Borch-Johnsen K, Ibsen H, Bergman RN, Hougaard P, Winther K, Pedersen O: Insulin sensitivity index, acute insulin response, and glucose effectiveness in a population-based sample of 380 young healthy Caucasians. Analysis of the impact of gender, body fat, physical fitness, and life-style factors. *J Clin Invest* 98:1195-1209, 1996

10. Poulsen P, Levin K, Petersen I, Christensen K, Beck-Nielsen H, Vaag A: Heritability of insulin secretion, peripheral and hepatic insulin action, and intracellular glucose partitioning in young and old Danish twins. *Diabetes* 54:275-283, 2005

11. World Health Organization Study Group: Definition, Diagnosis and Classification of Diabetes Mellitus and its Complications. Part 1: Diagnosis and Classification of Diabetes Mellitus. Geneva, World Health Organization. 1999

12. Hansen T, Drivsholm T, Urhammer SA, Palacios RT, Volund A, Borch-Johnsen K, Pedersen O: The BIGTT test: a novel test for simultaneous measurement of pancreatic beta-cell function, insulin sensitivity, and glucose tolerance. *Diabetes Care* 30:257-262, 2007

13. Bergman RN, Prager R, Volund A, Olefsky JM: Equivalence of the insulin sensitivity index in man derived by the minimal model method and the euglycemic glucose clamp. *J Clin Invest* 79:790-800, 1987
